# Supplementary material for: Phenolic Profile of Herbal Infusion and Polyphenol-Rich Extract from Leaves of the Medicinal Plant Antirhea borbonica: Toxicity Assay Determination in Zebrafish Embryos and Larvae
Source: MDPI journal article supplement (doi:10.3390/molecules25194482), 2020-09-29
Supplement: s1 [file s1]

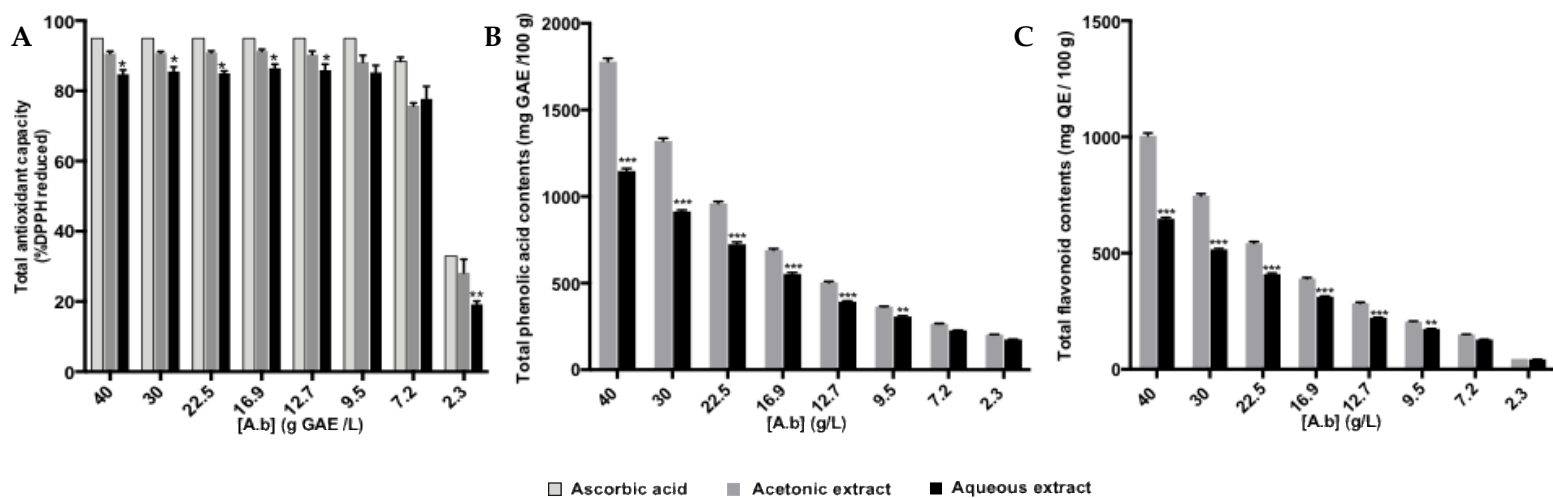

**Figure S1. Total phenolic acid, flavonoid content and antioxidant capacity from *A. borbonica* extracts.**

(A) The total antioxidant capacity of polyphenols-rich extracts from *A. borbonica* (*A.b*) were measured by DPPH assay at different concentrations ranging from 40 to 2.3 g GAE/L. Ascorbic acid was used as positive control. The results were expressed as % DPPH reduced. (B) The total phenolic contents of an acetonic and aqueous extracts from *A. borbonica* were determined by using the Folin-Ciocalteu colorimetric assays at different concentrations ranging from 40 to 2.3 g/L (dried plant powder). The results were expressed as mg gallic acid equivalent (GAE)/100 g dried plant powder. (C) The total flavonoid contents were determined by using the aluminum chloride colorimetric assay. The results were expressed as mg quercetin equivalent (QE)/100g dried plant powder. Data are mean  $\pm$  SD of three independent experiments. \*  $p < 0.05$ , \*\*  $p < 0.01$ , \*\*\*  $p < 0.001$  (vs. acetonic extract).

F: FTMS - p ESI d Full ms2 191.0553@hcd25.00 [50.0000-215.0000]

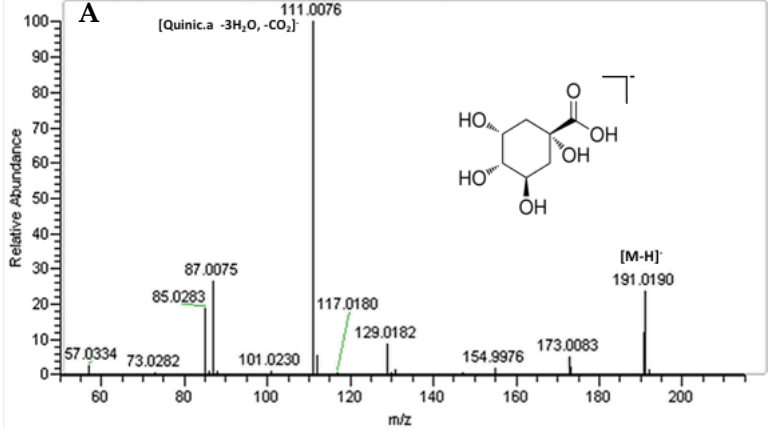

F: FTMS - p ESI d Full ms2 153.0183@hcd25.00 [50.0000-175.0000]

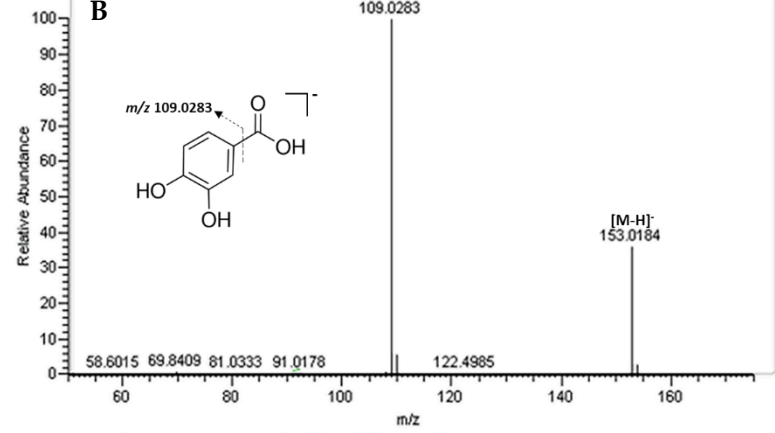

F: FTMS - p ESI d Full ms2 353.0879@hcd25.00 [50.0000-380.0000]

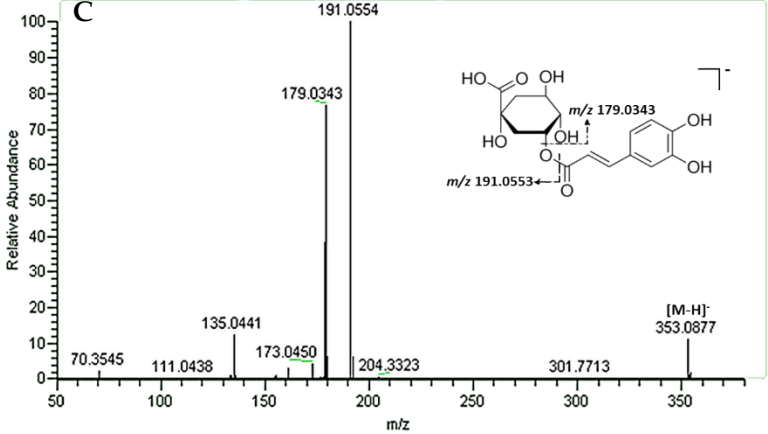

F: FTMS - p ESI d Full ms2 353.0879@hcd25.00 [50.0000-380.0000]

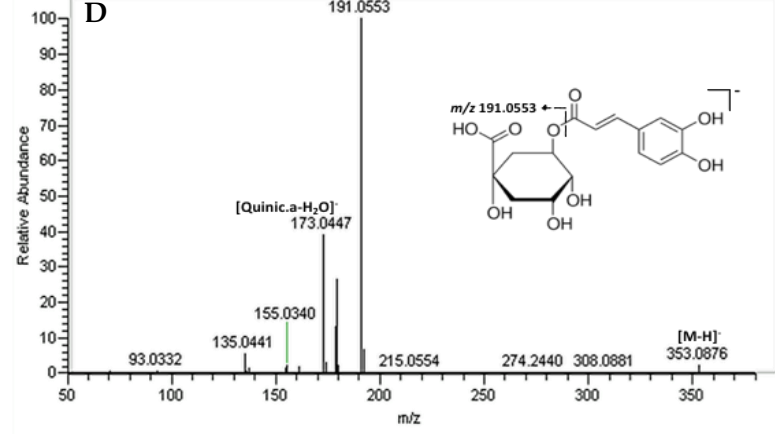

F: FTMS - p ESI d Full ms2 609.1468@hcd25.00 [50.0000-640.0000]

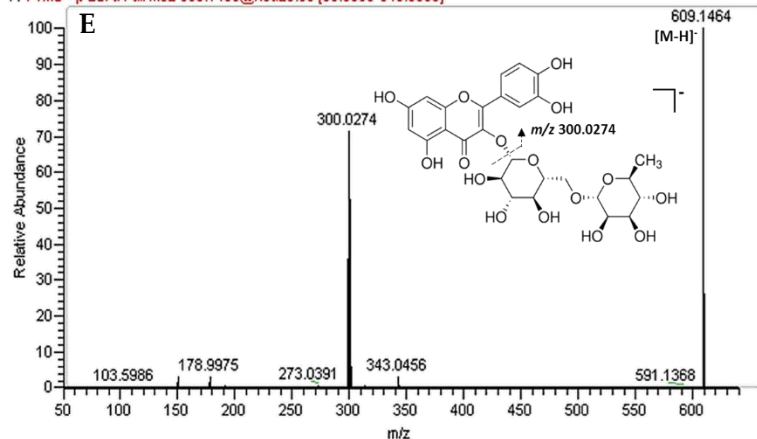

F: FTMS - p ESI d Full ms2 463.0885@hcd25.00 [50.0000-490.0000]

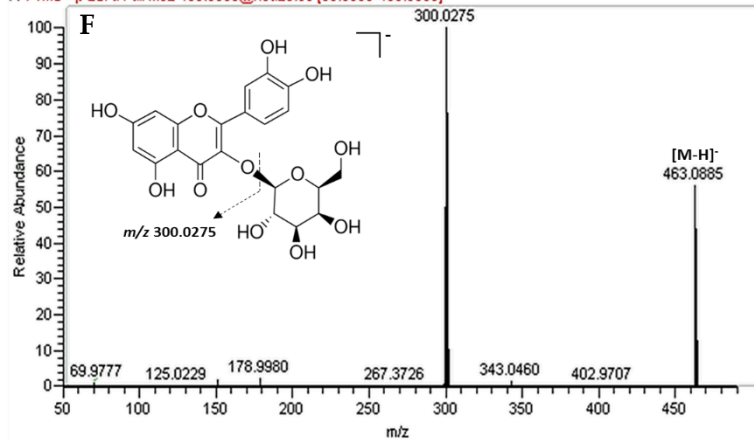

F: FTMS - p ESI d Full ms2 447.0936@hcd25.00 [50.0000-475.0000]

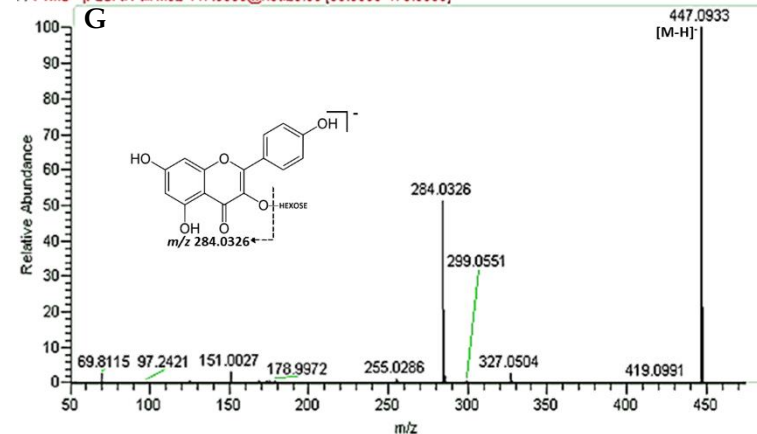

F: FTMS - p ESI d Full ms2 515.1194@hcd25.00 [50.0000-545.0000]

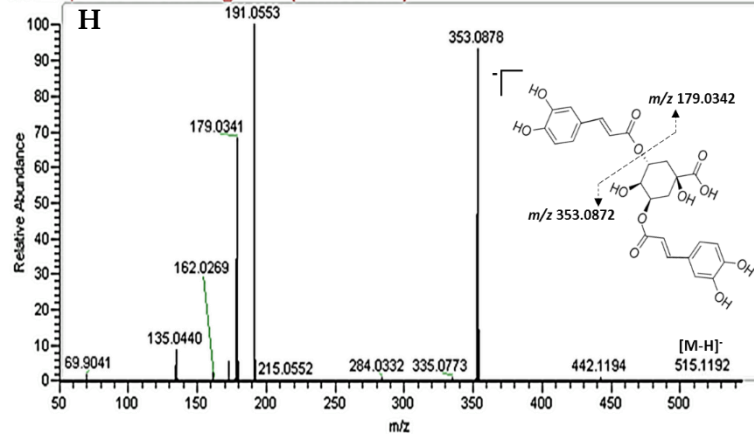

F: FTMS - p ESI d Full ms2 515.1194@hcd25.00 [50.0000-545.0000]

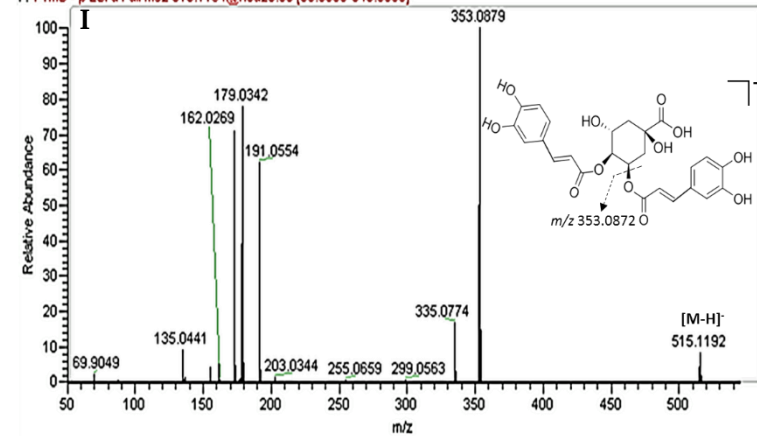

F: FTMS - p ESI d Full ms2 353.0880@hcd25.00 [50.0000-380.0000]

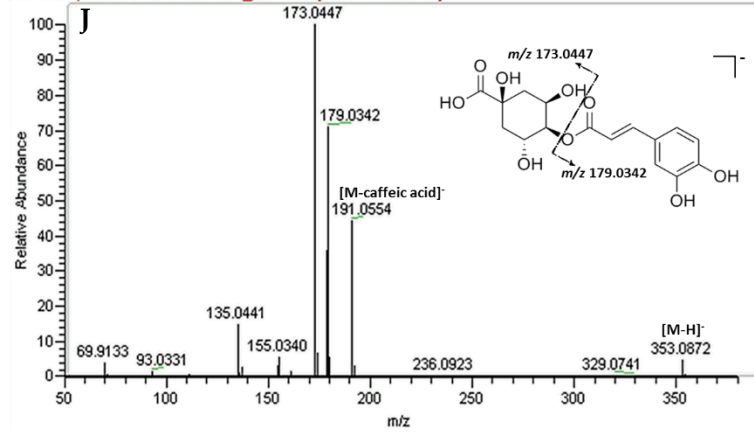

F: FTMS - p ESI d Full ms2 179.0342@hcd25.00 [50.0000-200.0000]

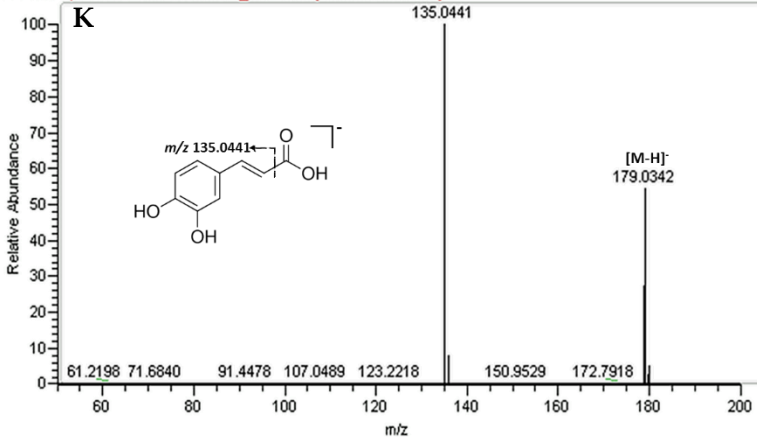

F: FTMS - p ESI d Full ms2 337.0930@hcd25.00 [50.0000-365.0000]

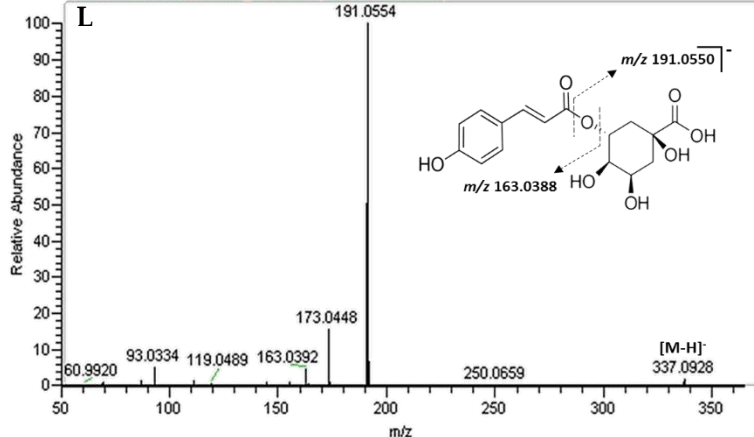

F: FTMS - p ESI d Full ms2 337.0900@hcd25.00 [50.0000-710.0000]

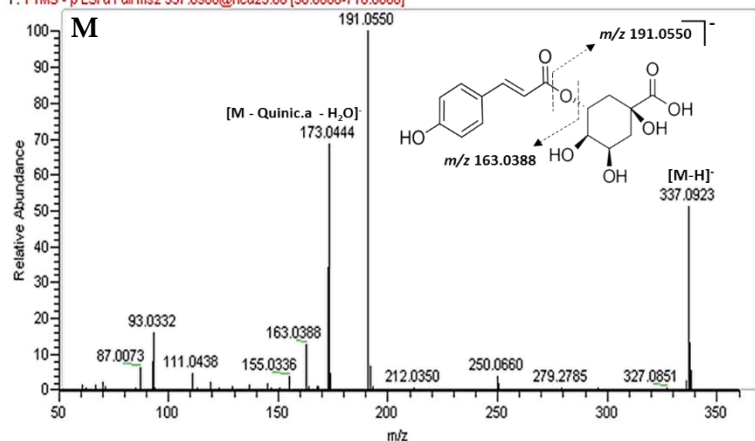

F: FTMS - p ESI d Full ms2 163.0391@hcd25.00 [50.0000-185.0000]

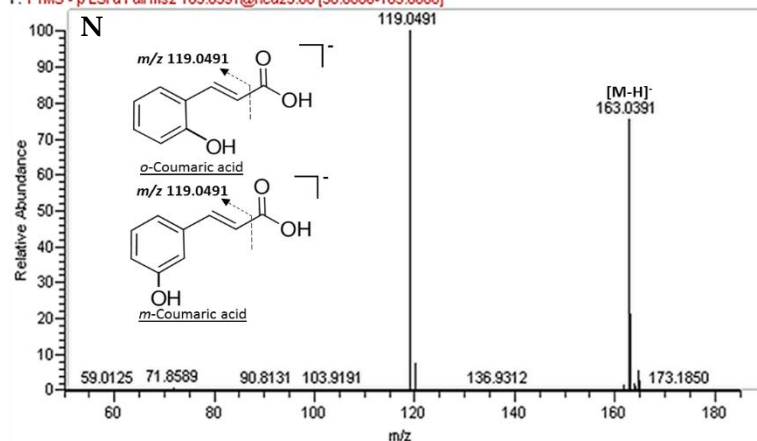

F: FTMS - p ESI d Full ms2 367.1029@hcd25.00 [50.0000-395.0000]

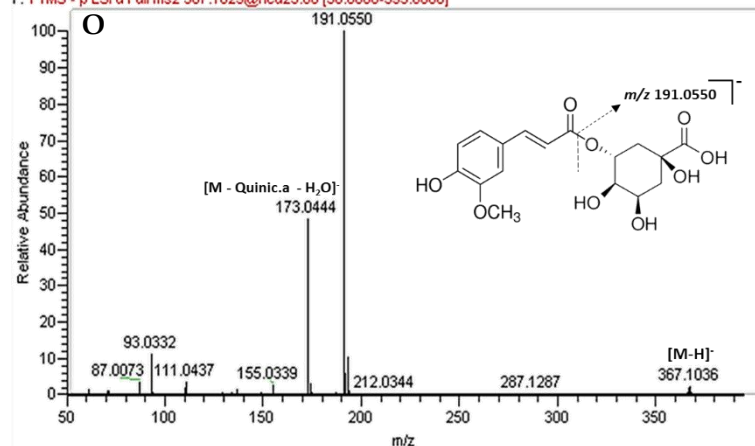

F: FTMS - p ESI d Full ms2 163.0391@hcd25.00 [50.0000-185.0000]

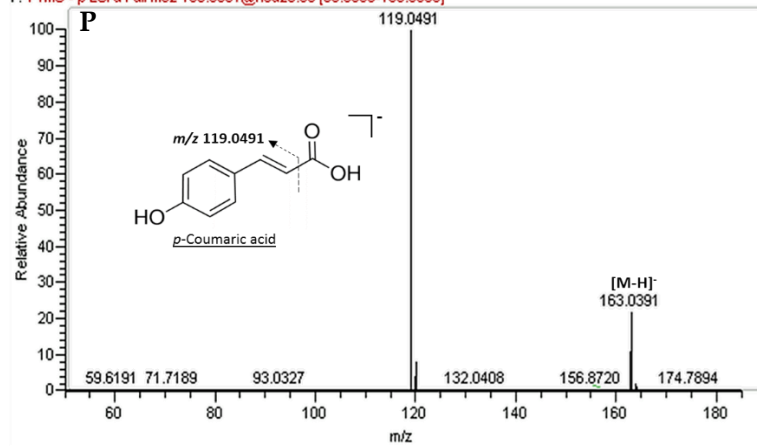

F: FTMS - p ESI d Full ms2 515.1194@hcd25.00 [50.0000-545.0000]

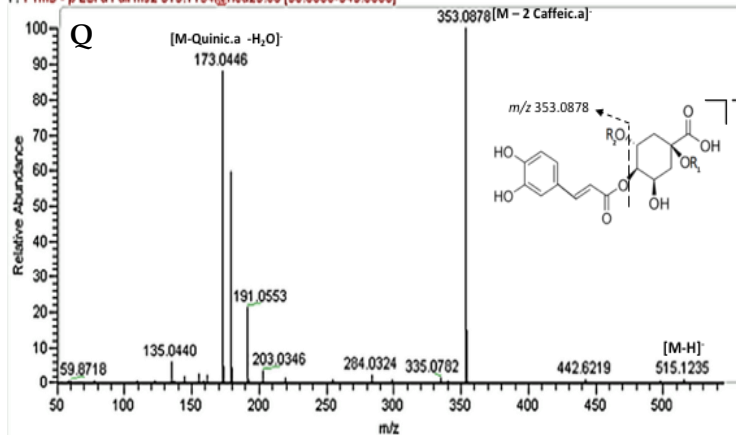

Figure S2. The fragmentation pattern of each identified compounds obtained in negative mode.

(A) Quinic a. (B) Protocatechuic a. (C) 3-Caffeoylquinic a. (D) 5-Caffeoylquinic a. (E) Quercetin-3-O-rutinoside (F) Quercetin-3-O-glucoside (G) Kaempferol-O-hexoside (H) 3,5-Dicaffeoylquinic a. (I) 3,4-Dicaffeoylquinic a. (J) 4-Caffeoylquinic a. (K) Caffeic a. (L) *p*-Coumaroylquinic a. (M) *p*-Coumaroylquinic a. (N) *o/m*-coumaric a. (O) Feruloylquinic a. (-OR<sub>2</sub>) (P) *p*-coumaric a. (Q) 1,4-Dicaffeoylquinic a. (-OR<sub>1</sub>) / 4,5-Dicaffeoylquinic.a (-OR<sub>2</sub>) .

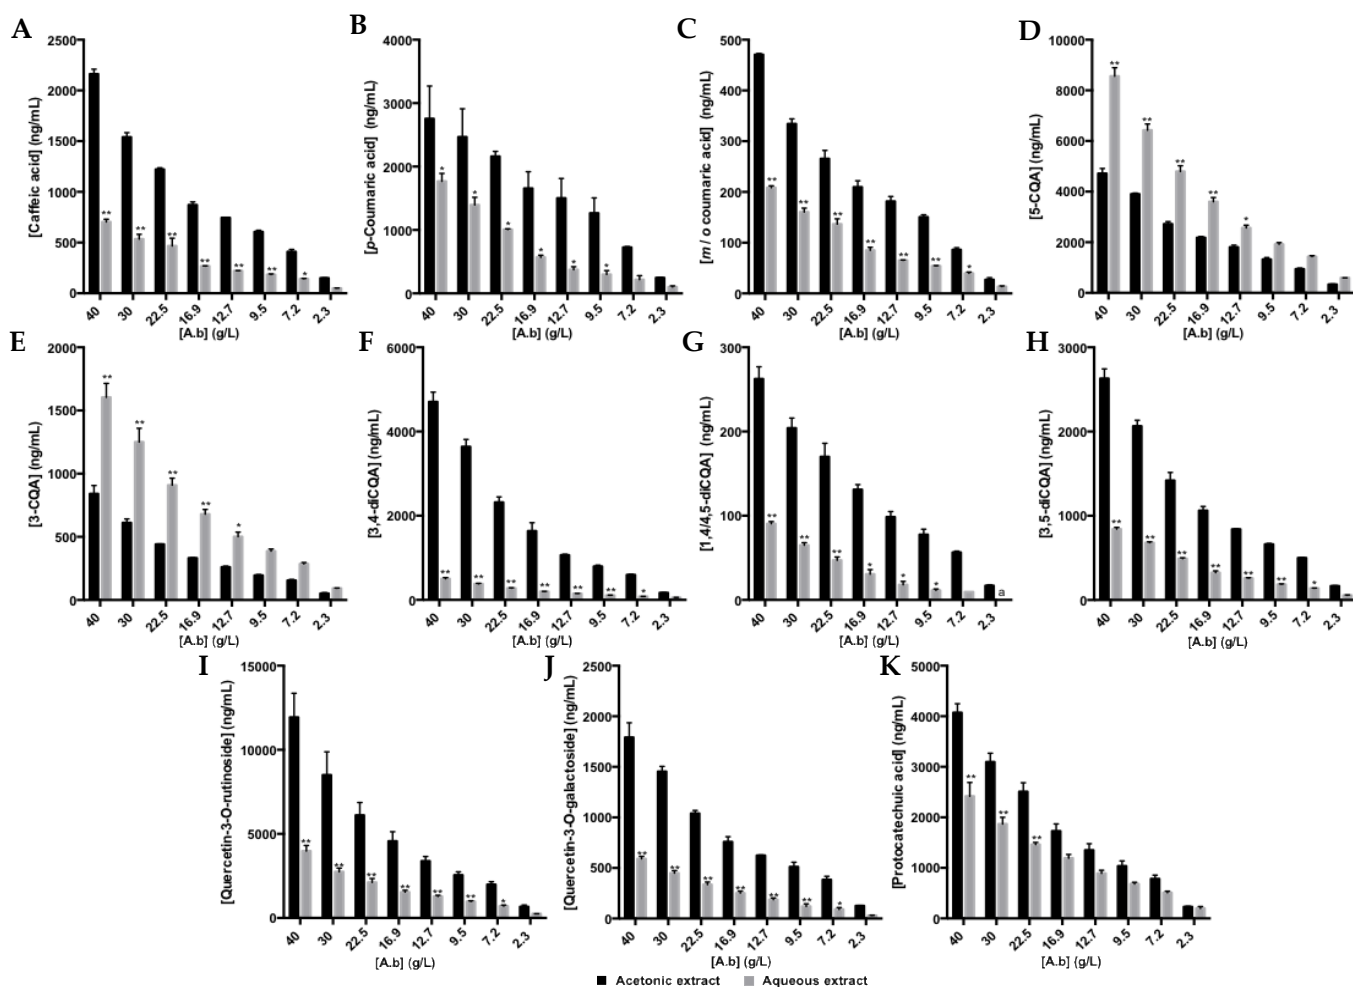

**Figure S3. Quantification of polyphenols-rich acetic and aqueous extracts from *A. borbonica* by UHPLC-ESI-MS.**

The analysis were performed by using a Q-Exactive plus mass spectrometer at different concentrations ranging from 40 to 2.3 g/L (dried plant powder). (A) Caffeic a. (B) *p*-Coumaric a. (C) *o/m*-Coumaric a. (D) 5-Caffeoylquinic a. (E) 3-Caffeoylquinic a., (F) 3,4-Dicaffeoylquinic a., (G) 1,4/4,5-Dicaffeoylquinic a. (H) 3,5-Dicaffeoylquinic a. (I) Quercetin-3-O-rutinoside (J) Quercetin-3-O-glucoside (K) Protocatechuic a. The concentrations of compounds were expressed as ng/mL. Data are mean  $\pm$  SD of three independent experiments. \*  $p < 0.05$ , \*\*  $p < 0.01$  (vs. acetic extract). Item <sup>a</sup>: Under limit of quantification (<LOQ).

Table S1. Identification of 20 compounds in *Antirhea borbonica* herbal infusion by LC-HESI-UV-MS/MS in negative mode

| Compound                               | Molecular formula                               | Mass error (ppm) | [M-H] <sup>-</sup> |
|----------------------------------------|-------------------------------------------------|------------------|--------------------|
| D-(-)-Quinic acid                      | C <sub>7</sub> H <sub>12</sub> O <sub>6</sub>   | 0.4              | 191.0554           |
| Gallic acid                            | C <sub>7</sub> H <sub>5</sub> O <sub>5</sub>    | 0.2              | 169.0142           |
| Protocatechuic acid                    | C <sub>7</sub> H <sub>6</sub> O <sub>4</sub>    | 0.13             | 153.0184           |
| 3-Caffeoylquinic acid                  | C <sub>16</sub> H <sub>18</sub> O <sub>9</sub>  | 1.03             | 353.0877           |
| 5-Caffeoylquinic acid                  | C <sub>16</sub> H <sub>18</sub> O <sub>9</sub>  | 1.03             | 353.0877           |
| Caffeic acid                           | C <sub>9</sub> H <sub>8</sub> O <sub>4</sub>    | 0.2              | 179.0341           |
| <i>p</i> -Coumaroyl quinic acid isomer | C <sub>16</sub> H <sub>18</sub> O <sub>8</sub>  | 1.3              | 337.0931           |
| <i>p</i> -Coumaroyl quinic acid isomer | C <sub>16</sub> H <sub>18</sub> O <sub>8</sub>  | 1.3              | 337.0931           |
| <i>o/m</i> -Coumaric acid              | C <sub>9</sub> H <sub>8</sub> O <sub>3</sub>    | 0.2              | 163.0391           |
| Feruloylquinic acid                    | C <sub>17</sub> H <sub>20</sub> O <sub>9</sub>  | 0.5              | 367.1035           |
| <i>p</i> -Coumaric acid                | C <sub>9</sub> H <sub>8</sub> O <sub>3</sub>    | 0.1              | 163.0391           |
| Quercetin-3-O-rutinoside (Rutin)       | C <sub>27</sub> H <sub>30</sub> O <sub>16</sub> | 1.6              | 609.1466           |
| Quercetin-3-O-galactoside (hyperoside) | C <sub>21</sub> H <sub>20</sub> O <sub>12</sub> | 1.33             | 463.0884           |
| Quercetin-3-O-glucoside                | C <sub>21</sub> H <sub>20</sub> O <sub>12</sub> | 1.33             | 463.0884           |
| Kaempferol-O-hexoside                  | C <sub>21</sub> H <sub>20</sub> O <sub>11</sub> | 1.35             | 447.0935           |
| Kaempferol-O-hexoside                  | C <sub>21</sub> H <sub>20</sub> O <sub>11</sub> | 1.35             | 447.0935           |
| 3,5-Dicaffeoylquinic acid              | C <sub>25</sub> H <sub>24</sub> O <sub>12</sub> | 1.04             | 515.1196           |
| 3,4-Dicaffeoylquinic acid              | C <sub>25</sub> H <sub>24</sub> O <sub>12</sub> | 1.04             | 515.1195           |
| 4-Caffeoylquinic acid                  | C <sub>16</sub> H <sub>18</sub> O <sub>9</sub>  | 1.03             | 353.0877           |
| 1,4/4,5-Dicaffeoylquinic acid          | C <sub>25</sub> H <sub>24</sub> O <sub>12</sub> | 1.04             | 515.1194           |
